# Supplementary material
Source: MDPI journal article supplement (https://www.mdpi.com/1424-2818/14/10/806)
Supplement: s1 [file s1]

**Table S1.** List of indices used for morphological analysis of Atlantic salmon. Indices are ratios between traits, which are designated as distances between the landmarks shown at Figure 1.

| <b>Index</b><br><i>(indices used in calculations are marked with “*”)</i> | <b>Index Description: A Ratio of the Distances between Reference Points (Traits)</b> |
|---------------------------------------------------------------------------|--------------------------------------------------------------------------------------|
| Ind1                                                                      | 1-2 / 1-4                                                                            |
| Ind2*                                                                     | 1-3 / 1-4                                                                            |
| Ind3                                                                      | 2-3 / 1-4                                                                            |
| Ind4*                                                                     | 2-4 / 1-4                                                                            |
| Ind5                                                                      | 3-4 / 1-4                                                                            |
| Ind6*                                                                     | 5-7 / 5-6                                                                            |
| Ind7*                                                                     | 6-7 / 5-6                                                                            |
| Ind8*                                                                     | 8-9 / 8-12                                                                           |
| Ind9                                                                      | 8-10 / 8-12                                                                          |
| Ind10                                                                     | 8-11 / 8-12                                                                          |
| Ind11                                                                     | 8-13 / 8-12                                                                          |
| Ind12                                                                     | 8-14 / 8-12                                                                          |
| Ind13                                                                     | 9-10 / 8-12                                                                          |
| Ind14                                                                     | 9-11 / 8-12                                                                          |
| Ind15                                                                     | 9-12 / 8-12                                                                          |
| Ind16                                                                     | 9-13 / 8-12                                                                          |
| Ind17                                                                     | 9-14 / 8-12                                                                          |
| Ind18                                                                     | 10-11 / 8-12                                                                         |
| Ind19                                                                     | 10-12 / 8-12                                                                         |
| Ind20                                                                     | 10-13 / 8-12                                                                         |
| Ind21                                                                     | 10-14 / 8-12                                                                         |
| Ind22                                                                     | 11-12 / 8-12                                                                         |
| Ind23*                                                                    | 11-13 / 8-12                                                                         |
| Ind24*                                                                    | 11-14 / 8-12                                                                         |
| Ind25                                                                     | 12-13 / 8-12                                                                         |
| Ind26                                                                     | 12-14 / 8-12                                                                         |
| Ind27                                                                     | 13-14 / 8-12                                                                         |
| Ind28                                                                     | 15-17 / 15-18                                                                        |
| Ind29*                                                                    | 15-16 / 15-18                                                                        |
| Ind30                                                                     | 17-18 / 15-18                                                                        |
| Ind31*                                                                    | 16-18 / 15-18                                                                        |
| Ind32                                                                     | 16-17 / 15-18                                                                        |
| Ind33*                                                                    | 19-20 / 20-22                                                                        |
| Ind34                                                                     | 19-21 / 20-22                                                                        |
| Ind35                                                                     | 19-22 / 20-22                                                                        |
| Ind36                                                                     | 20-21 / 20-22                                                                        |
| Ind37                                                                     | 21-22 / 20-22                                                                        |
| Ind38*                                                                    | 23-24 / 23-25                                                                        |
| Ind39                                                                     | 24-25 / 23-25                                                                        |
